# Supplementary material
Source: Elsevier journal article supplement (https://www.sciencedirect.com/science/article/pii/S2530064422000104)
Supplement: mmc2 [file S2530064422000104:mmc2.xlsx]

## Sheet: Protected_areas
Original name	Management	Location	Established	area AFD - km2	Governance type	Land tenure resolved?	source of land tenure information
Parque Nacional do Iguaçu	Strictly protection	PR-BRA	1944	504.45	national	yes	https://documentacao.socioambiental.org/ato_normativo/UC/3266_20180411_143549.pdf
Parque Nacional de São Joaquim	Strictly protection	SC-BRA	1961	395.737	national	no	https://www.wikiparques.org/wiki/Parque_Nacional_de_S%C3%A3o_Joaquim
Parque Estadual do Rio Turvo	Strictly protection	SP-BRA	2008	387.896	sub-national	yes	https://documentacao.socioambiental.org/ato_normativo/UC/4799_20200527_133156.pdf
Parque Provincial Urugua-í	Strictly protection	MI-ARG	1988	328.816	sub-national	yes	https://www.vidasilvestre.org.ar/nuestro_trabajo/areas_protegidas/reservas/urugua_i/la_reserva_urugua_i/
Parque Nacional dos Campos Gerais	Strictly protection	PR-BRA	2006	210.776	national	no	https://www.wikiparques.org/wiki/Parque_Nacional_dos_Campos_Gerais
Parque Estadual da Serra do Papagaio	Strictly protection	MG-BRA	1998	208.156	sub-national	no	http://conservacao.mpambiental.org/wp-content/uploads/2015/03/20140918-ESB-ACP-PARQUE-ESTADUAL-SERRA-DO-PAPAGAIO-uc.doc
Parque Nacional da Serra da Bocaina	Strictly protection	RJ/SP-BRA	1972	203.585	national	no	https://www.icmbio.gov.br/parnaserradabocaina/
Refúgio de Vida Silvestre dos Campos de Palmas1	Strictly protection	PR-BRA	2006	165.574	national	not required	http://www.planalto.gov.br/ccivil_03/_ato2004-2006/2006/dnn/Dnn10807.htm
Reserva Biológica das Araucárias	Strictly protection	PR-BRA	2006	148.842	national	no	http://www.planalto.gov.br/ccivil_03/_Ato2004-2006/2006/Dnn/Dnn10795.htm
Parque Nacional das Araucárias	Strictly protection	SC-BRA	2005	127.042	national	no	https://www.wikiparques.org/wiki/Parque_Nacional_das_Arauc%C3%A1rias
Parque Nacional de Itatiaia	Strictly protection	MG-BRA	1937	88.8667	national	no	https://www.irib.org.br/noticias/detalhes/ministerio-do-meio-ambiente-undefined-parque-nacional-itatiaia-recebe-doacao-de-terra-de-92-6-hectares
Parque Nacional da Serra Geral	Strictly protection	RS/SC-BRA	1992	86.7078	national	no	https://www.gov.br/icmbio/pt-br/assuntos/biodiversidade/unidade-de-conservacao/unidades-de-biomas/mata-atlantica/lista-de-ucs/parna-de-aparados-da-serra/arquivos/dcom_pm_parna_de_aparados_da_serra_encarte_2.pdf
Parque Nacional de Aparados da Serra	Strictly protection	RS/SC-BRA	1959	82.573	national	no	https://www.gov.br/icmbio/pt-br/assuntos/biodiversidade/unidade-de-conservacao/unidades-de-biomas/mata-atlantica/lista-de-ucs/parna-de-aparados-da-serra/arquivos/dcom_pm_parna_de_aparados_da_serra_encarte_2.pdf
Parque Estadual Nascentes do Paranapanema	Strictly protection	SP-BRA	2012	82.4127	sub-national	no	https://www.al.sp.gov.br/repositorio/legislacao/decreto/2012/decreto-58148-21.06.2012.html
Parque Estadual Turístico do Alto Ribeira - PETAR	Strictly protection	SP-BRA	1958	74.3226	sub-national	no	https://smastr16.blob.core.windows.net/consema/2018/05/anexo-3-do-relatorio-da-ctbio-de-27-04-2018-aprovado-na-68a-reuniao-resumo-executivo-versao-2018.pdf
Parque Estadual da Serra da Esperança	Strictly protection	PR-BRA	2010	69.4435	sub-national	no	https://documentacao.socioambiental.org/ato_normativo/UC/3026_20180319_093211.pdf
Parque Estadual do Tainhas	Strictly protection	RS-BRA	1975	66.5938	sub-national	no	https://www.sema.rs.gov.br/parque-estadual-do-tainhas
Estação Ecológica da Mata Preta	Strictly protection	SC-BRA	2005	66.0136	national	no	https://www.gov.br/icmbio/pt-br/assuntos/biodiversidade/unidade-de-conservacao/unidades-de-biomas/mata-atlantica/lista-de-ucs/esec-da-mata-preta
Parque Estadual de Campos do Jordão	Strictly protection	SP-BRA	1941	64.8144	sub-national	no	https://justica.sp.gov.br/index.php/sjc-e-itesp-entregam-trabalhos-de-regularizacao-fundiaria-de-parques-estaduais-a-secretaria-de-infraestrutura-e-meio-ambiente/
Parque Estadual Caverna do Diabo	Strictly protection	SP-BRA	2008	59.3474	sub-national	yes	https://documentacao.socioambiental.org/ato_normativo/UC/4799_20200527_133156.pdf
Parque Estadual do Lago Azul	Strictly protection	PR-BRA	1997	44.938	sub-national	yes	https://documentacao.socioambiental.org/ato_normativo/UC/4247_20200228_065019.pdf
Parque Estadual de Vila Velha	Strictly protection	PR-BRA	1953	41.5518	sub-national	yes	https://www.folhadelondrina.com.br/geral/concessao-de-vila-velha-sera-modelo-para-parques-estaduais-do-parana-2956898e.html
Parque Estadual do Podocarpus2	Strictly protection	RS-BRA	1975	36.45	sub-national	no	https://www.sema.rs.gov.br/parque-estadual-do-podocarpus
Parque Estadual da Serra do Tabuleiro	Strictly protection	SC-BRA	1975	33.4305	sub-national	no	https://www.snh2019.anpuh.org/resources/anais/8/1564356092_ARQUIVO_ANEXACOESEDESANEXACOESDOPARQUEESTADUALDASERRADOTABULEIRO.pdf
Parque Provincial Piñalito	Strictly protection	MI-ARG	1993	32.5881	sub-national	yes	http://digestomisiones.gob.ar/uploads/documentos/leyes/LEY%20XVI%20-%20N%2057.pdf
Monumento Natural Pedra do Baú	Strictly protection	SP-BRA	2010	31.54	sub-national	no	https://www.al.sp.gov.br/repositorio/legislacao/decreto/2010/decreto-56613-28.12.2010.html
Estação Ecológica Aratinga	Strictly protection	RS-BRA	1997	30.7068	sub-national	no	https://www.sema.rs.gov.br/estacao-ecologica-estadual-aratinga
Parque Provincial Guardaparque Horacio Foerster	Strictly protection	MI-ARG	1992	29.2431	sub-national	yes	https://web.archive.org/web/20160818153312/http://www.diputadosmisiones.gov.ar/digesto_juridico/documentos/254.pdf
Reserva Biológica da Serra Geral	Strictly protection	RS-BRA	1982	26.5798	sub-national	no	https://www.sema.rs.gov.br/reserva-biologica-da-serra-geral
Parque Estadual Serra da Baitaca	Strictly protection	PR-BRA	2002	25.474	sub-national	yes	https://www.legislacao.pr.gov.br/legislacao/listarAtosAno.do?action=exibirImpressao&codAto=33124
Parque Nacional Guaricana	Strictly protection	PR-BRA	2004	23.0258	national	no	https://documentacao.socioambiental.org/ato_normativo/UC/1715_20141015_145439.pdf
Parque Estadual Carlos Botelho	Strictly protection	SP-BRA	1982	20.6861	sub-national	yes	http://s.ambiente.sp.gov.br/fundacaoflorestal/planos-manejo/VolumePrincipalCompleto.pdf
Reserva Nacional Kuri'y2	Strictly protection	AP-PY	1978	20	sub-national	no	http://parquesnacionalesdelparaguay.blogspot.com/2015/07/los-bosques-amenazados-de-araucaria-en.html
Parque Estadual do Cerrado	Strictly protection	PR-BRA	1992	15.1207	sub-national	yes	http://www.iat.pr.gov.br/sites/agua-terra/arquivos_restritos/files/documento/2020-11/ata_10.08.09.pdf
Reserva Biológica do Aguaí	Strictly protection	SC-BRA	1983	15.0888	sub-national	no	https://www.ima.sc.gov.br/index.php/noticias/1110-ima-inicia-cadastro-para-regularizacao-fundiaria-das-unidades-de-conservacao-estaduais
Parque Estadual da Serra Furada	Strictly protection	SC-BRA	1980	14.7065	sub-national	no	https://nossosparques.org.br/es/noticia/201072
Parque Estadual do Espigão Alto	Strictly protection	RS-BRA	1949	14.3887	sub-national	yes	https://www.sema.rs.gov.br/parque-estadual-de-espigao-alto
Parque Estadual Cunhambebe	Strictly protection	RJ-BRA	2008	13.7564	sub-national	no	https://documentacao.socioambiental.org/ato_normativo/UC/4601_20200511_084432.pdf
Estação Ecológica do Rio dos Touros	Strictly protection	PR-BRA	2001	12.1617	sub-national	yes	https://documentacao.socioambiental.org/ato_normativo/UC/4311_20200305_102520.pdf
Parque Estadual Rio Canoas	Strictly protection	SC-BRA	2004	11.3415	sub-national	yes	https://www.ima.sc.gov.br/index.php/biodiversidade/unidades-de-conservacao/parque-estadual-rio-canoas
Parque Estadual de Caxambu	Strictly protection	PR-BRA	1979	11.0821	sub-national	yes	https://documentacao.socioambiental.org/ato_normativo/UC/4227_20200227_142428.pdf
Parque Estadual das Lauráceas	Strictly protection	PR-BRA	1979	11.0188	sub-national	no	https://www.oeco.org.br/reportagens/denuncia-expoe-abertura-de-estrada-ilegal-dentro-de-parque-estadual-no-parana/
Parque Estadual do Papagaio Charão	Strictly protection	RS-BRA	1982	10.0921	sub-national	yes	https://www.sema.rs.gov.br/parque-estadual-do-papagaio-charao
Parque Estadual Pico do Marumbi	Strictly protection	PR-BRA	2007	9.73864	sub-national	no	https://documentacao.socioambiental.org/ato_normativo/UC/4307_20200305_095448.pdf
Parque Estadual do Vale do Codó	Strictly protection	PR-BRA	2007	8.6101	sub-national	no	https://documentacao.socioambiental.org/ato_normativo/UC/4334_20200319_095743.pdf
Parque Estadual do Guartelá	Strictly protection	PR-BRA	1992	8.38155	sub-national	no	http://www.iat.pr.gov.br/sites/agua-terra/arquivos_restritos/files/documento/2020-07/pe_guartela_cap_v_analise_da_uc.pdf
Parque Estadual das Araucárias (PR)	Strictly protection	PR-BRA	1998	7.21228	sub-national	no	https://documentacao.socioambiental.org/ato_normativo/UC/4216_20200227_131655.pdf
Parque Estadual de Santa Clara	Strictly protection	PR-BRA	2006	6.31939	sub-national	no	https://documentacao.socioambiental.org/ato_normativo/UC/3047_20180320_093259.pdf
Parque Estadual das Araucárias (SC)	Strictly protection	SC-BRA	2003	6.26094	sub-national	yes	https://www.ima.sc.gov.br/index.php/biodiversidade/unidades-de-conservacao/parque-estadual-das-araucarias
Parque Provincial Cruce Caballero	Strictly protection	MI-ARG	1989	5.36791	sub-national	yes	http://digestomisiones.gob.ar/uploads/documentos/leyes/LEY%20XVI%20-%20N%2028.pdf?v=23032021120256
Estação Ecológica Fernandes Pinheiros	Strictly protection	PR-BRA	2001	5.13123	sub-national	yes	https://documentacao.socioambiental.org/ato_normativo/UC/4233_20200227_151359.pdf
Parque Estadual Roberto Ribas Lange	Strictly protection	PR-BRA	1994	4.9738	sub-national	yes	https://documentacao.socioambiental.org/ato_normativo/UC/4978_20200821_223245.pdf
Parque Estadual dos Mananciais de Campos do Jordão	Strictly protection	SP-BRA	1993	4.86157	sub-national	no	https://justica.sp.gov.br/index.php/sjc-e-itesp-entregam-trabalhos-de-regularizacao-fundiaria-de-parques-estaduais-a-secretaria-de-infraestrutura-e-meio-ambiente/
Reserva Natural Estricta San Antonio	Strictly protection	MI-ARG	1990	4.78563	sub-national	yes	http://servicios.infoleg.gob.ar/infolegInternet/anexos/0-4999/4606/norma.htm
Parque Estadual do Ibitiriá	Strictly protection	RS-BRA	1975	4.71342	sub-national	no	https://www.sema.rs.gov.br/parque-estadual-do-ibitiria
Parque Estadual do Monge	Strictly protection	PR-BRA	1960	3.63543	sub-national	yes	https://www.icmbio.gov.br/cepsul/images/stories/legislacao/Decretos/1979/dec_6351_1979_hortoflorestaljacarezinho_pr.pdf
Reserva Biológica do Sassafrás	Strictly protection	SC-BRA	1977	3.47544	sub-national	no	https://uc.socioambiental.org/pt-br/noticia/201072
Parque Estadual Campinhos	Strictly protection	PR-BRA	1960	3.40759	sub-national	no	https://documentacao.socioambiental.org/ato_normativo/UC/4224_20200227_140402.pdf
Parque Estadual do Lagamar de Cananéia	Strictly protection	SP-BRA	2008	3.06753	sub-national	yes	https://documentacao.socioambiental.org/ato_normativo/UC/4799_20200527_133156.pdf
Parque Estadual Penhasco Verde	Strictly protection	PR-BRA	1991	3.04633	sub-national	yes	https://documentacao.socioambiental.org/ato_normativo/UC/4304_20200305_082052.pdf?_ga=2.136165745.1734051441.1630456784-37187256.1630456784
Estação Ecológica Xitué	Strictly protection	SP-BRA	1957	3.00142	sub-national	yes	https://documentacao.socioambiental.org/ato_normativo/UC/4718_20200518_211148.pdf
Estação Ecológica de Aracuri-Esmeralda	Strictly protection	RS-BRA	1981	2.7642	national	yes	https://www.icmbio.gov.br/portal/images/stories/imgs-unidades-coservacao/encarte_2.pdf
Parque Estadual Fritz Plaumann	Strictly protection	SC-BRA	2003	2.08636	sub-national	yes	https://www.ima.sc.gov.br/index.php/biodiversidade/unidades-de-conservacao/parque-estadual-fritz-plaumann
Refúgio de Vida Silvestre do Pinhão	Strictly protection	PR-BRA	1983	1.97	sub-national	yes	https://documentacao.socioambiental.org/ato_normativo/UC/4905_20200616_130044.pdf
Estação Ecológica de Itaberá	Strictly protection	SP-BRA	1987	1.90666	sub-national	yes	https://documentacao.socioambiental.org/ato_normativo/UC/4695_20200518_204453.pdf
Parque Estadual de Palmas	Strictly protection	PR-BRA	2007	1.81461	sub-national	yes	https://documentacao.socioambiental.org/ato_normativo/UC/5002_20200822_210442.pdf
Monumento Natural Gruta da Lancinha	Strictly protection	PR-BRA	2006	1.649	sub-national	no	https://www.cavernas.org.br/legislacao/decreto-estadual-no-6-538/
Parque Estadual Vitório Piassa	Strictly protection	PR-BRA	2009	1.47561	sub-national	no	https://documentacao.socioambiental.org/ato_normativo/UC/4240_20200227_161811.pdf
Reserva Biológica Estadual da Biodiversidade COP9 MOP4	Strictly protection	PR-BRA	2010	1.3314	sub-national	no	https://www.legislacao.pr.gov.br/legislacao/pesquisarAto.do?action=exibir&codAto=54952&indice=1&totalRegistros=7&dt=27.0.2021.15.0.2.470
Horto Florestal Geraldo Russi	Strictly protection	PR-BRA	1965	1.222	sub-national	yes	https://www.icmbio.gov.br/cepsul/images/stories/legislacao/Portaria/1965/dec_20027_1965_hortoflorestaldeimbau_mun.tibagi_pr.pdf
Estação Ecológica de Itapeva	Strictly protection	SP-BRA	1985	0.92273	sub-national	yes	https://documentacao.socioambiental.org/ato_normativo/UC/4697_20200518_204643.pdf
Parque Provincial Araucaria	Strictly protection	MI-ARG	1991	0.91776	sub-national	yes	http://digestomisiones.gob.ar/uploads/documentos/leyes/LEY%20XVI%20-%20N%2028.pdf?v=23032021120256
Parque Estadual Pico Paraná	Strictly protection	PR-BRA	2002	0.83727	sub-national	yes	https://documentacao.socioambiental.org/ato_normativo/UC/4308_20200305_095818.pdf
Parque Nacional do Serra do Itajaí	Strictly protection	SC-BRA	2004	0.52297	national	no	https://www.icmbio.gov.br/portal/images/stories/imgs-unidades-coservacao/pn_serra_do_itaja%C3%AD.pdf
Monumento Natural Natural Salto São João	Strictly protection	PR-BRA	2010	0.41	sub-national	no	https://www.legislacao.pr.gov.br/legislacao/pesquisarAto.do?action=exibir&codAto=58455&indice=1&totalRegistros=2
Parque Estadual João Paulo II	Strictly protection	PR-BRA	1986	0.04525	sub-national	yes	https://documentacao.socioambiental.org/ato_normativo/UC/4246_20200228_064736.pdf
Área de Proteção Ambiental Estadual da Escarpa Devoniana	Sustainable use	PR-BRA	1992	4147.05	sub-national	not required
Área de Proteção Ambiental da Serra da Mantiqueira	Sustainable use	SP/MG-BRA	1995	2311.66	national	not required
Área de Proteção Ambiental Estadual da Serra da Esperança	Sustainable use	PR-BRA	1992	2045.14	sub-national	not required
Área de Proteção Ambiental Fernão Dias	Sustainable use	MG-BRA	1997	1771.25	sub-national	not required
Área de Proteção Ambiental Bacia Hidrográfica do Rio Machado	Sustainable use	MG-BRA	1999	568.917	sub-national	not required
Área de Proteção Ambiental Sapucaí-Mirim	Sustainable use	SP-BRA	1998	372.824	sub-national	not required
Área de Proteção Ambiental Rota do Sol	Sustainable use	RS-BRA	2009	368.879	sub-national	not required
Reserva de Biosfera Yabotí	Sustainable use	MI-ARG	1995	321.077	sub-national	not required
Área de Proteção Ambiental Campos do Jordão	Sustainable use	SP-BRA	1984	274.749	sub-national	not required
Área de Proteção Ambiental do Passaúna	Sustainable use	PR-BRA	1991	190.12	sub-national	not required
Área de Proteção Ambiental Estadual do Rio Verde	Sustainable use	PR-BRA	2000	147.596	sub-national	not required
Área de Proteção Ambiental da Serra do Mar	Sustainable use	SP-BRA	1984	135.395	sub-national	not required
Área de Proteção Ambiental Guaratuba	Sustainable use	PR-BRA	1992	127.914	sub-national	not required
Área de Proteção Ambiental de Guaraqueçaba	Sustainable use	PR-BRA	1985	125.003	national	not required
Área de Proteção Ambiental Estadual do Iraí	Sustainable use	PR-BRA	1996	110.29	sub-national	not required
Área de Proteção Ambiental Estadual de Piraquara	Sustainable use	PR-BRA	1996	81.6799	sub-national	not required
Área de Proteção Ambiental Guaraqueçaba	Sustainable use	PR-BRA	1985	79.8822	sub-national	not required
Área de Proteção Ambiental Estadual do Rio Pequeno	Sustainable use	PR-BRA	1996	62.3467	sub-national	not required
Área Experimental Guarani	Sustainable use	MI-ARG	1975	47.3377	sub-national	yes	https://web.archive.org/web/20160818154742/http://www.sib.gov.ar/area/MISIONES*GU*GUARANI
Floresta Nacional Três Barras	Sustainable use	SC-BRA	1968	43.8529	national	yes	https://www.icmbio.gov.br/portal/images/stories/plano-de-manejo/dcom_plano_de_manejo_Flona_Tres_Barras_vol_I.pdf
Floresta Nacional de Capão Bonito	Sustainable use	SP-BRA	1968	42.1316	national	yes	https://www.gov.br/icmbio/pt-br/assuntos/biodiversidade/unidade-de-conservacao/unidades-de-biomas/cerrado/lista-de-ucs/flona-de-capao-bonito/arquivos/portaria_flona_capao_bonitodecreto.pdf
Floresta Nacional Irati	Sustainable use	PR-BRA	1968	38.0247	national	yes	https://www.icmbio.gov.br/portal/images/stories/docs-planos-de-manejo/flona_irati_vol1_pm.pdf
Área de Proteção Ambiental do Planalto do Turvo	Sustainable use	SP-BRA	2008	27.1895	sub-national	not required
Reserva de Desenvolvimento Sustentável dos Quilombos de Barra do Turvo	Sustainable use	SP-BRA	2008	17.7937	sub-national	yes	https://documentacao.socioambiental.org/ato_normativo/UC/4799_20200527_133156.pdf
Área de Proteção Ambiental do Rio Pardinho e do Rio Vermelho	Sustainable use	SP-BRA	2008	15.0453	sub-national	not required
Área de Proteção Ambiental Mananciais da Bacia do Rio Paraíba do Sul	Sustainable use	SP-BRA	1982	14.0681	national	not required
Área de Proteção Ambiental Corumbatai, Botucatu e Tejupá	Sustainable use	SP-BRA	1983	13.693	sub-national	not required
Floresta Nacional Passo Fundo	Sustainable use	RS-BRA	1968	13.3359	national	yes	https://www.icmbio.gov.br/portal/images/stories/imgs-unidades-coservacao/Volume_I_PF_maio_2012_final.pdf
Floresta Nacional São Francisco de Paula	Sustainable use	RS-BRA	1968	12.8174	national	yes	http://www.florestanacional.com.br/historico.html
Floresta Nacional Chapecó	Sustainable use	SC-BRA	1968	12.1327	national	yes	https://www.gov.br/icmbio/pt-br/assuntos/biodiversidade/unidade-de-conservacao/unidades-de-biomas/mata-atlantica/lista-de-ucs/flona-de-chapeco/arquivos/portaria_chapecodecretocriacao.pdf
Área de Proteção Ambiental dos Rios Piracicaba e Juqueri-Mirim	Sustainable use	SP-BRA	1987	8.96458	sub-national	not required
Área de Proteção Ambiental Sistema Cantareira	Sustainable use	SP-BRA	1998	8.41356	sub-national	not required
Floresta Nacional de Assungui	Sustainable use	PR-BRA	1968	7.18924	national	yes	https://www.icmbio.gov.br/portal/images/stories/plano-de-manejo/plano_de_manejo_floresta_nacional_de_assungui_volume1.pdf
Floresta Nacional Caçador	Sustainable use	SC-BRA	1968	7.0658	national	yes	https://www.gov.br/icmbio/pt-br/assuntos/biodiversidade/unidade-de-conservacao/unidades-de-biomas/mata-atlantica/lista-de-ucs/flona-de-cacador/arquivos/portaria_flona_cacadordecreto.pdf
Floresta Nacional de Canela	Sustainable use	RS-BRA	1968	5.63514	national	yes	https://www.gov.br/icmbio/pt-br/assuntos/biodiversidade/unidade-de-conservacao/unidades-de-biomas/mata-atlantica/lista-de-ucs/flona-de-canela/arquivos/volume_i_diagnostico_fn_canelaplano1.pdf
Reserva de Uso Múltiple Cuartel Victoria	Sustainable use	MI-ARG	1992	4.38183	sub-national	yes	https://sib.gob.ar/area/MISIONES*CV*E.E.A%20ANEXO%20CUARTEL%20RIO%20VICTORIA
Floresta Nacional Passa Quatro	Sustainable use	MG-BRA	1968	3.35367	national	yes	https://www.gov.br/icmbio/pt-br/assuntos/biodiversidade/unidade-de-conservacao/unidades-de-biomas/mata-atlantica/lista-de-ucs/flona-de-passa-quatro/arquivos/portaria_passo_quatro.pdf
Área de Relevante Interesse Ecológico Serra da Abelha	Sustainable use	SC-BRA	1990	3.24118	national	not required	https://documentacao.socioambiental.org/ato_normativo/UC/3088_20180322_181214.pdf
Floresta Estadual Metropolitana	Sustainable use	PR-BRA	1988	2.93646	sub-national	yes	https://documentacao.socioambiental.org/ato_normativo/UC/4294_20200302_072438.pdf
Área de Proteção Ambiental São Francisco Xavier	Sustainable use	SP-BRA	2002	2.92461	sub-national	not required
Floresta Estadual Passa Dois	Sustainable use	PR-BRA	1990	2.57134	sub-national	yes	https://documentacao.socioambiental.org/ato_normativo/UC/4300_20200302_085542.pdf
Reserva Natural Cultural Papel Misionero	Sustainable use	MI-ARG	1995	2.09399	sub-national	yes	https://web.archive.org/web/20160818165140/http://www.diputadosmisiones.gov.ar/digesto_juridico/documentos/243.pdf
Floresta Nacional Piraí do Sul	Sustainable use	PR-BRA	2004	1.50613	national	yes	https://www.wikiparques.org/wiki/Floresta_Nacional_de_Pira%C3%AD_do_Sul
Área de Relevante Interesse Ecológico do Buriti	Sustainable use	PR-BRA	1990	0.83102	sub-national	yes	https://documentacao.socioambiental.org/ato_normativo/UC/4219_20200227_132726.pdf
Floresta Estadual de Santana	Sustainable use	PR-BRA	1994	0.605	sub-national	yes	https://documentacao.socioambiental.org/ato_normativo/UC/4231_20200227_144405.pdf
Reserva de Desenvolvimento Sustentável dos Pinheirinhos	Sustainable use	SP-BRA	2008	0.43275	sub-national	yes	https://documentacao.socioambiental.org/ato_normativo/UC/4799_20200527_133156.pdf
Área de Relevante Interesse Ecológico de São Domingos	Sustainable use	PR-BRA	1990	0.40262	sub-national	yes	https://documentacao.socioambiental.org/ato_normativo/UC/4219_20200227_132726.pdf
Área de Proteção Ambiental de Cajati	Sustainable use	SP-BRA	2008	0.38443	sub-national	not required
Floresta Estadual Córrego da Biquinha	Sustainable use	PR-BRA	1994	0.36948	sub-national	yes	https://documentacao.socioambiental.org/ato_normativo/UC/4230_20200227_144134.pdf
Área de Relevante Interesse Ecológico Serra do Tigre	Sustainable use	PR-BRA	1990	0.33944	sub-national	yes	https://documentacao.socioambiental.org/ato_normativo/UC/4219_20200227_132726.pdf

## Sheet: legend
Acronym	Significance
AP	Alto Paraná Department
MG	Minas Gerais state
MI	Misiones province
PR	Paraná state
RJ	Rio de Janeiro state
RS	Rio Grande do Sul state
SC	Santa Catarina state
SP	São Paulo state
AR	Argentina
BRA	Brazil
PY	Paraguay
AFD	Araucaria Forest Domain
1	Despite being classified as Strictly Protected Area, it allows the use of land for agricultural production
2	Located in a relictual area
